# Supplementary material
Source: publisher figshare collection journal article supplement (https://acs.figshare.com/ndownloader/files/9724885)
Supplement: Supplementary file 1 [file 9724885]

## Supporting information

# **Pore-scale analysis of residual oil in a reservoir sandstone and its dependence on water flood salinity, oil composition and local mineralogy**

*Mehdi Shabaninejad<sup>\*†</sup>, Jill Middleton<sup>†</sup>, Shane Latham<sup>†</sup>, Andrew Fogden<sup>‡</sup>*

<sup>†</sup>Department of Applied Mathematics, Research School of Physics and Engineering, Australian National University, Canberra, ACT 2601, Australia

<sup>‡</sup>FEI Company, Suite 102, Level 1, 73 Northbourne Avenue Canberra, ACT 2600, Australia

\*To whom correspondence should be addressed. Telephone: +61-261256834. E-mail:  
[mehdi.shabaninejad@anu.edu.au](mailto:mehdi.shabaninejad@anu.edu.au)

**Table 1** Mineral composition of the reservoir sandstone from XRD.

| <b>Mineral</b>    | <b>%</b> |
|-------------------|----------|
| Quartz            | 33.0     |
| Alkali Feldspar   | 16.1     |
| Plagioclase       | 7.0      |
| Muscovite/Illite  | 9.8      |
| Mixed layer clays | 0.2      |
| Kaolinite         | 27.4     |
| Chlorite          | 0.4      |
| Calcite           | 0.0      |
| Dolomite/Ankerite | 0.6      |
| Siderite          | 4.8      |
| Pyrite            | 0.6      |

**Table 2** Modal mineralogy of each cross-section taken from the 5 mm diameter mini-plugs of reservoir sandstone analyzed by QEMSCAN.

| <b>Mini-plug</b>        | <b>A_slice1</b> | <b>A_slice2</b> | <b>A_slice3</b> | <b>B</b>     |
|-------------------------|-----------------|-----------------|-----------------|--------------|
| <b>Mineral</b>          | <b>Area%</b>    | <b>Area%</b>    | <b>Area%</b>    | <b>Area%</b> |
| <b>Quartz</b>           | 50.2            | 50.1            | 49.8            | 52.2         |
| <b>K Feldspar</b>       | 13.7            | 13.7            | 13.9            | 13.9         |
| <b>Plagioclase</b>      | 4.6             | 3.8             | 4.5             | 3.7          |
| <b>Muscovite/Illite</b> | 5.2             | 5.7             | 5.2             | 4.5          |
| <b>Biotite</b>          | 0.0             | 0.0             | 0.0             | 0.1          |
| <b>Kaolinite</b>        | 15.1            | 16.5            | 15.6            | 16.1         |
| <b>Chlorite</b>         | 2.2             | 1.8             | 2.1             | 1.6          |
| <b>Siderite</b>         | 5.4             | 4.4             | 5.1             | 4.1          |
| <b>Ankerite</b>         | 0.6             | 0.5             | 0.7             | 0.6          |
| <b>Garnet</b>           | 0.1             | 0.2             | 0.3             | 0.3          |
| <b>Zircon</b>           | 0.1             | 0.1             | 0.1             | 0.1          |
| <b>Rutile</b>           | 1.2             | 1.6             | 1.5             | 1.4          |
| <b>Fe Oxides Spinel</b> | 0.8             | 0.6             | 0.7             | 0.5          |
| <b>Pyrite</b>           | 0.1             | 0.0             | 0.1             | 0.4          |
| <b>Apatite</b>          | 0.4             | 0.4             | 0.1             | 0.3          |
| <b>Unclassified</b>     | 0.4             | 0.6             | 0.4             | 0.5          |
| <b>Total</b>            | 100.0           | 100.0           | 100.0           | 100.0        |

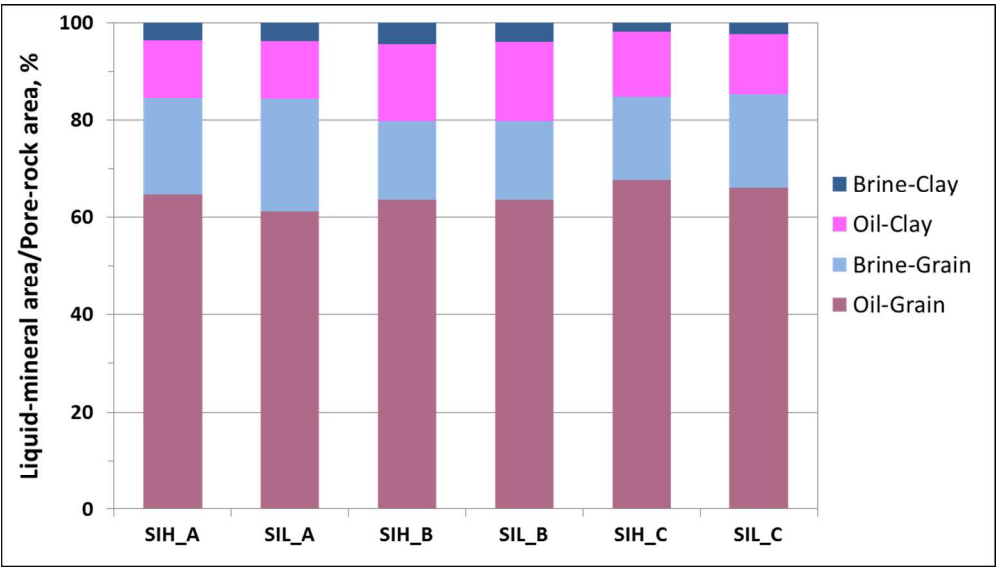

**Figure 1.** Interfacial area of liquid (oil and brine) contacting grain and clay aggregate, relative to total pore-rock area, for the three mini-plugs A-C after SIH and SIL.
